# Supplementary material for: Does Oral Hypofunction Promote Social Withdrawal in the Older Adults? A Longitudinal Survey of Elderly Subjects in Rural Japan
Source: PubMed Central journal article supplement (PMC7731335; doi:10.3390/ijerph17238904), 2020-11-30
Supplement: ijerph-17-08904-s001.pdf [file ijerph-17-08904-s001.pdf]

## Kihon Checklist

| No. | Questions                                                                                                          | Answer                          |                                |
|-----|--------------------------------------------------------------------------------------------------------------------|---------------------------------|--------------------------------|
| 1   | Do you go out by bus or train by yourself?                                                                         | <input type="checkbox"/> 0. YES | <input type="checkbox"/> 1. NO |
| 2   | Do you go shopping to buy daily necessities by yourself?                                                           | <input type="checkbox"/> 0. YES | <input type="checkbox"/> 1. NO |
| 3   | Do you manage your own deposits and savings at the bank?                                                           | <input type="checkbox"/> 0. YES | <input type="checkbox"/> 1. NO |
| 4   | Do you sometimes visit your friends?                                                                               | <input type="checkbox"/> 0. YES | <input type="checkbox"/> 1. NO |
| 5   | Do you turn to your family or friends for advice?                                                                  | <input type="checkbox"/> 0. YES | <input type="checkbox"/> 1. NO |
| 6   | Do you normally climb stairs without using handrail or wall for support?                                           | <input type="checkbox"/> 0. YES | <input type="checkbox"/> 1. NO |
| 7   | Do you normally stand up from a chair without any aids?                                                            | <input type="checkbox"/> 0. YES | <input type="checkbox"/> 1. NO |
| 8   | Do you normally walk continuously for 15 minutes?                                                                  | <input type="checkbox"/> 0. YES | <input type="checkbox"/> 1. NO |
| 9   | Have you experienced a fall in the past year?                                                                      | <input type="checkbox"/> 1. YES | <input type="checkbox"/> 0. NO |
| 10  | Do you have a fear of falling while walking?                                                                       | <input type="checkbox"/> 1. YES | <input type="checkbox"/> 0. NO |
| 11  | Have you lost 2kg or more in the past 6 months?                                                                    | <input type="checkbox"/> 1. YES | <input type="checkbox"/> 0. NO |
| 12  | Height:cm, Weight:            kg, BMI:    kg/m <sup>2</sup> If BMI is less than 18.5, this item is scored.         | <input type="checkbox"/> 1. YES | <input type="checkbox"/> 0. NO |
| 13  | Do you have any difficulties eating tough foods compared to 6 months ago?                                          | <input type="checkbox"/> 1. YES | <input type="checkbox"/> 0. NO |
| 14  | Have you choked on your tea or soup recently?                                                                      | <input type="checkbox"/> 1. YES | <input type="checkbox"/> 0. NO |
| 15  | Do you often experience having a dry mouth?                                                                        | <input type="checkbox"/> 1. YES | <input type="checkbox"/> 0. NO |
| 16  | Do you go out at least once a week?                                                                                | <input type="checkbox"/> 0. YES | <input type="checkbox"/> 1. NO |
| 17  | Do you go out less frequently compared to last year?                                                               | <input type="checkbox"/> 1. YES | <input type="checkbox"/> 0. NO |
| 18  | Do your family or your friends point out your memory loss?<br>e.g."You ask the same question over and over again." | <input type="checkbox"/> 1. YES | <input type="checkbox"/> 0. NO |
| 19  | Do you make a call by looking up phone numbers?                                                                    | <input type="checkbox"/> 0. YES | <input type="checkbox"/> 1. NO |
| 20  | Do you find yourself not knowing today's date?                                                                     | <input type="checkbox"/> 1. YES | <input type="checkbox"/> 0. NO |
| 21  | In the last 2 weeks have you felt a lack of fulfillment in your daily life?                                        | <input type="checkbox"/> 1. YES | <input type="checkbox"/> 0. NO |
| 22  | In the last 2 weeks have you felt a lack of joy when doing the things you used to enjoy?                           | <input type="checkbox"/> 1. YES | <input type="checkbox"/> 0. NO |
| 23  | In the last 2 weeks have you felt difficulty in doing what you could do easily before?                             | <input type="checkbox"/> 1. YES | <input type="checkbox"/> 0. NO |
| 24  | In the last 2 weeks have you felt helpless?                                                                        | <input type="checkbox"/> 1. YES | <input type="checkbox"/> 0. NO |
| 25  | In the last 2 weeks have you felt tired without a reason?                                                          | <input type="checkbox"/> 1. YES | <input type="checkbox"/> 0. NO |

(Working Group on Frailty in JGS)
